# Supplementary material for: Dendritic Cell-Based Immunotherapy in Advanced Sarcoma and Neuroblastoma Pediatric Patients: Anti-cancer Treatment Preceding Monocyte Harvest Impairs the Immunostimulatory and Antigen-Presenting Behavior of DCs and Manufacturing Process Outcome
Source: PubMed Central journal article supplement (PMC6823179; doi:10.3389/fonc.2019.01034), 2019-10-25
Supplement: Image_1.pdf [file Image_1.pdf]

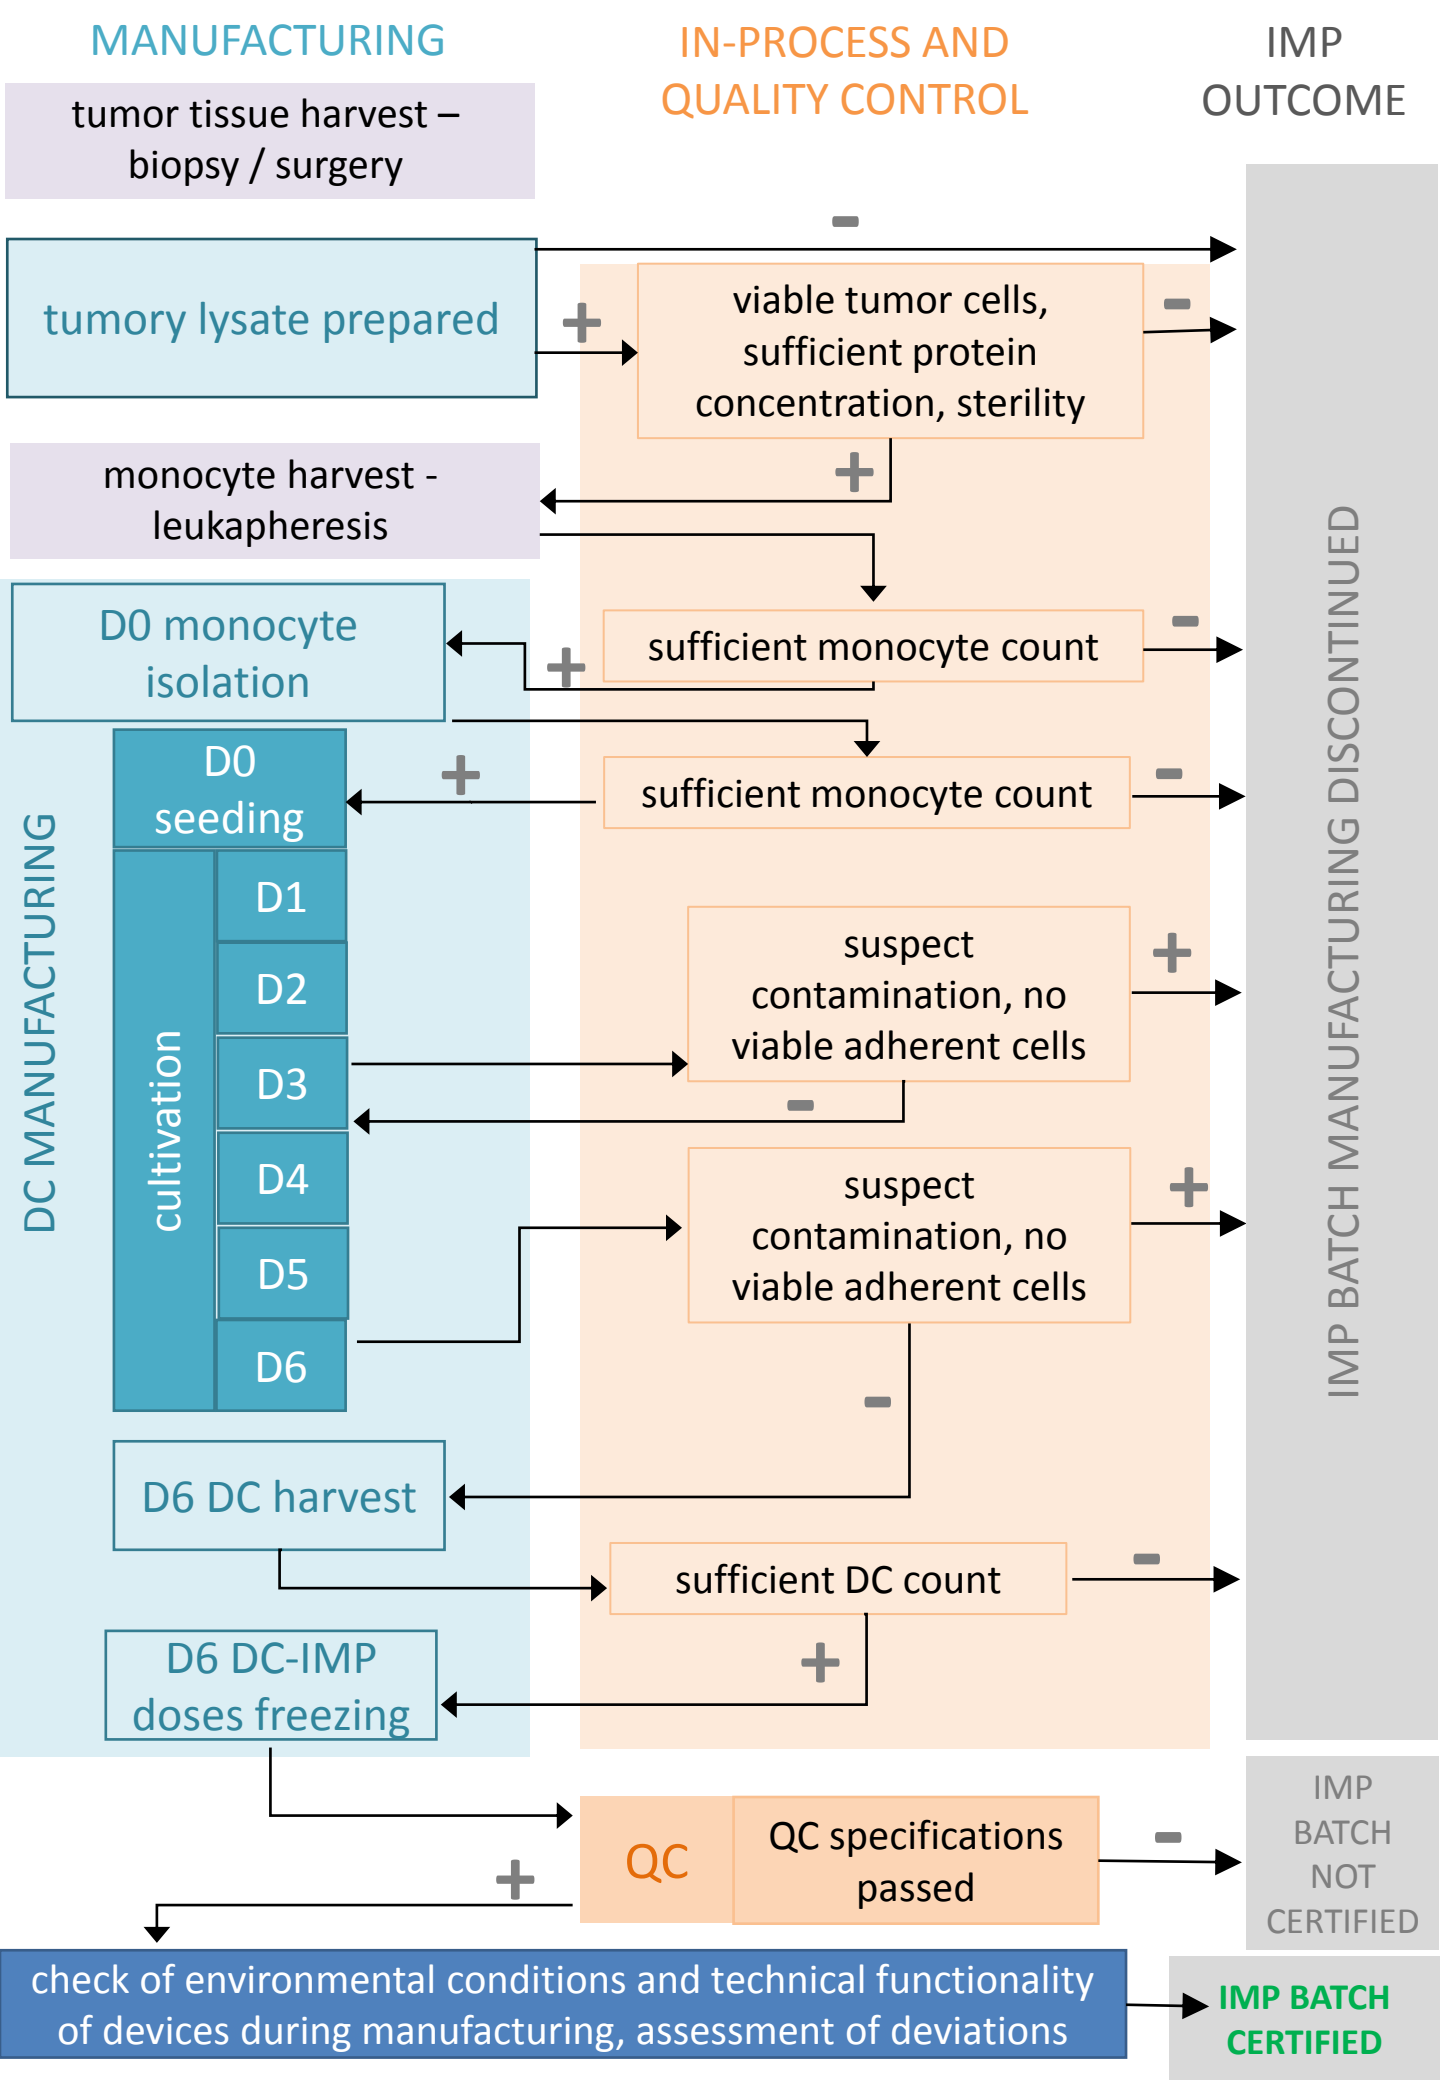

## SM2. Figure 1.

**Decision tree for DC-IMP manufacturing workflow including in-process and quality controls.** Manufacturing of DC-IMP includes tumor lysate and DC manufacturing (blue rectangle). During manufacturing, in-process controls (orange rectangle) are carried out. On the basis of in-process control results, manufacturing is being continued or discontinued (grey rectangle). When manufacturing is completed and sufficient count of DCs is harvested, final product quality control is performed (dark orange rectangle). In the case, the manufactured product does not pass the QC specifications, IMP batch is not certified. If IMP pass the QC specifications, IMP batch is certified after final check of documentation, check of environmental conditions (control of microbial and particle monitoring) and technical functionality of devices (air conditioning, instruments) during manufacturing and assesment of deviations (dark blue rectangle).
